# Supplementary material for: Factors influencing health-promoting behavior among single mothers in Northeastern Malaysia: a cross-sectional study
Source: PeerJ. 2024 Oct 31;12:e18359. doi: 10.7717/peerj.18359 (PMC11531751; doi:10.7717/peerj.18359)
Supplement: Supplemental Information 1 — The demographic characteristics of the respondents, together with the scores obtained for the three tools incorporated in the study: Health beliefs related to cardiovascular disease, multidimensional perceived social support, and health-promoting lifestyle profile II. [file peerj-12-18359-s001.xlsx]

## Sheet: Form Responses 1
ID	Age	race	race2	maritalstatus	education	education2	income	income2	jobstatus	Comorbidities	HBCVD1	HBCVD2	HBCVD3	HBCVD4	HBCVD5	HBCVD6	HBCVD7	HBCVD8	HBCVD9	HBCVD10	HBCVD11	HBCVD12	HBCVD13	HBCVD14	HBCVD15	HBCVD16	R8HBCVD11	R8HBCVD12	R8HBCVD13	R8HBCVD14	R8HBCVD15	R8HBCVD16	HBCVD18	HBCVD21	HBCVD23	HBCVD24	HBCVD25	Susceptibility	Severity	Benefits	Barriers	PSS1	PSS2	PSS3	PSS4	PSS5	PSS6	PSS7	PSS8
KB1	33	Malay	Malay	divorcee	degree	Higher education	≥RM6620 (T20)	High income	employed	No	2	1	2	2	2	3	3	3	3	3	4	4	4	4	4	4	1	1	1	1	1	1	1	2	2	1	2	9	15	6	8	5	5	7	7	4	5	5	5
KB2	50	Malay	Malay	widow	Primary & Secondary school	Lower education	≥RM6620 (T20)	Low income	Non employed	No	3	3	2	3	2	3	3	2	3	1	4	4	4	4	4	1	1	1	1	1	1	4	2	3	3	3	3	13	12	9	14	6	7	7	7	7	4	1	6
KB7	46	Malay	Malay	widow	degree	Higher education	RM 3030 hingga RM 6619 (M40)	High income	employed	No	1	1	1	2	3	2	3	4	4	3	4	4	3	4	4	3	1	1	2	1	1	2	1	2	1	1	2	8	16	8	7	5	5	7	7	4	5	5	7
BC31	51	Malay	Malay	widow	degree	Higher education	RM 3030 hingga RM 6619 (M40)	High income	employed	No	2	2	2	2	2	3	3	3	2	2	3	3	3	3	3	3	2	2	2	2	2	2	2	3	2	2	3	10	13	12	12	4	4	6	6	4	5	5	5
KB8	46	Malay	Malay	divorcee	Primary & Secondary school	Lower education	<RM 3030 (B40)	Low income	employed	No	3	2	2	2	2	4	3	3	3	1	2	4	4	3	3	3	3	1	1	2	2	2	1	1	1	1	1	11	14	11	5	2	6	5	5	6	3	3	3
TP1	32	Malay	Malay	divorcee	Primary & Secondary school	Lower education	<RM 3030 (B40)	Low income	employed	Yes	3	3	3	3	4	4	3	4	3	3	3	3	3	4	4	3	2	2	2	1	1	2	2	2	2	2	3	16	17	10	11	5	5	5	5	3	5	5	5
KB3	57	Malay	Malay	widow	degree	Higher education	≥RM6620 (T20)	High income	employed	No	2	2	2	2	2	1	1	2	3	2	4	4	4	4	4	4	1	1	1	1	1	1	1	2	1	1	2	10	9	6	7	7	7	7	7	7	5	5	6
KB9	39	Malay	Malay	divorcee	Certificate/Diploma/STPM	Higher education	≥RM6620 (T20)	High income	employed	No	2	2	2	2	2	2	2	3	3	1	3	3	3	3	3	3	2	2	2	2	2	2	2	3	3	2	3	10	11	12	13	7	7	7	7	7	5	5	7
KB10	41	Malay	Malay	widow	Master/Phd	Higher education	<RM 3030 (B40)	Low income	employed	Yes	1	1	1	1	1	2	1	2	2	2	3	3	3	3	3	3	2	2	2	2	2	2	2	2	2	2	3	5	9	12	11	5	5	5	5	5	5	5	5
KB4	54	Malay	Malay	widow	Primary & Secondary school	Lower education	<RM 3030 (B40)	Low income	employed	Yes	2	2	2	2	2	3	2	4	3	2	4	4	4	4	4	4	2	1	1	1	1	1	1	1	1	1	1	10	14	7	5	7	7	7	7	7	5	5	7
KB5	43	Malay	Malay	divorcee	Certificate/Diploma/STPM	Higher education	<RM 3030 (B40)	Low income	Non employed	No	2	2	2	2	2	3	2	3	2	2	3	4	4	4	4	4	2	1	1	1	1	1	1	2	1	1	1	10	12	7	6	4	1	5	5	1	3	3	2
TM10	52	Malay	Malay	widow	Primary & Secondary school	Lower education	<RM 3030 (B40)	Low income	Non employed	No	3	3	3	3	3	2	3	3	3	3	3	3	3	3	3	3	2	2	2	2	2	2	2	2	2	3	3	15	14	12	12	5	5	5	5	3	3	3	5
BC32	41	Malay	Malay	divorcee	degree	Higher education	RM 3030 hingga RM 6619 (M40)	High income	employed	Yes	2	2	2	1	2	3	3	3	3	2	4	4	4	4	4	4	1	1	1	1	1	1	1	1	1	1	2	9	14	6	6	5	5	7	7	5	6	5	6
KB6	47	Malay	Malay	divorcee	degree	Higher education	RM 3030 hingga RM 6619 (M40)	High income	employed	No	1	1	1	1	2	3	3	4	4	3	4	4	4	4	4	3	1	1	1	1	1	2	1	1	1	2	2	6	17	7	7	5	7	5	7	5	5	5	5
BC33	29	Malay	Malay	divorcee	Primary & Secondary school	Lower education	<RM 3030 (B40)	Low income	Non employed	No	3	3	3	3	3	2	2	4	2	2	4	4	4	4	4	3	1	1	1	1	1	2	3	3	2	4	4	15	12	7	16	1	2	1	1	1	1	1	1
MEL1	59	Malay	Malay	widow	Primary & Secondary school	Lower education	<RM 3030 (B40)	Low income	Non employed	No	3	3	2	2	2	3	3	3	3	3	3	3	4	3	3	3	2	2	1	2	2	2	3	3	3	3	3	12	15	11	15	5	5	5	5	5	5	3	5
MEL2	25	Malay	Malay	divorcee	Primary & Secondary school	Lower education	<RM 3030 (B40)	Low income	Non employed	No	2	2	2	2	2	3	3	3	2	2	3	3	3	3	3	3	2	2	2	2	2	2	3	3	3	3	3	10	13	12	15	5	5	5	5	5	5	5	5
MEL3	44	Malay	Malay	widow	Primary & Secondary school	Lower education	<RM 3030 (B40)	Low income	Non employed	No	3	3	3	3	3	3	3	3	3	3	3	3	3	3	3	3	2	2	2	2	2	2	3	2	2	2	2	15	15	12	11	5	5	5	5	5	5	5	5
MEL4	42	Malay	Malay	divorcee	Primary & Secondary school	Lower education	<RM 3030 (B40)	Low income	employed	No	4	4	4	4	4	3	3	3	3	3	3	3	4	4	4	3	2	2	1	1	1	2	2	2	2	2	2	20	15	9	10	6	6	6	6	6	6	6	6
MEL5	55	Malay	Malay	widow	Primary & Secondary school	Lower education	<RM 3030 (B40)	Low income	Non employed	No	4	4	4	4	4	3	3	3	3	3	3	3	4	3	3	3	2	2	1	2	2	2	2	2	2	2	2	20	15	11	10	6	6	6	6	6	6	6	6
MEL6	45	Malay	Malay	divorcee	Primary & Secondary school	Lower education	<RM 3030 (B40)	Low income	Non employed	No	1	2	1	2	4	2	3	3	3	3	3	3	4	4	4	3	2	2	1	1	1	2	3	2	3	3	2	10	14	9	13	5	3	5	5	5	5	5	5
MEL7	49	Malay	Malay	widow	Primary & Secondary school	Lower education	<RM 3030 (B40)	Low income	employed	No	2	2	2	1	1	3	2	3	3	1	3	3	4	3	4	3	2	2	1	2	1	2	2	2	2	2	2	8	12	10	10	6	6	6	6	6	6	6	6
MEL8	56	Malay	Malay	widow	Primary & Secondary school	Lower education	<RM 3030 (B40)	Low income	Non employed	Yes	3	3	3	3	4	4	4	4	3	3	4	4	3	4	4	3	1	1	2	1	1	2	2	3	2	2	2	16	18	8	11	5	6	6	7	6	6	5	5
MEL9	34	Malay	Malay	divorcee	Primary & Secondary school	Lower education	<RM 3030 (B40)	Low income	employed	No	3	3	3	3	3	4	3	3	3	3	3	3	3	3	3	3	2	2	2	2	2	2	2	2	2	2	2	15	16	12	10	6	6	6	6	6	6	5	5
MEL10	42	Malay	Malay	widow	Certificate/Diploma/STPM	Higher education	<RM 3030 (B40)	Low income	employed	No	4	4	3	3	3	4	3	3	3	3	3	3	3	3	4	3	2	2	2	2	1	2	1	2	2	2	2	17	16	11	9	6	6	6	6	6	5	5	6
MEL11	29	Malay	Malay	divorcee	Primary & Secondary school	Lower education	<RM 3030 (B40)	Low income	employed	No	4	4	4	4	3	4	3	3	3	4	3	3	4	3	3	3	2	2	1	2	2	2	1	2	2	2	2	19	17	11	9	5	5	6	6	6	6	5	7
MEL12	59	Malay	Malay	widow	No formal education	Lower education	<RM 3030 (B40)	Low income	Non employed	Yes	3	3	3	3	3	3	3	3	3	3	3	3	3	3	3	3	2	2	2	2	2	2	2	2	2	2	2	15	15	12	10	5	5	5	5	5	5	5	5
MEL13	57	Malay	Malay	divorcee	Primary & Secondary school	Lower education	<RM 3030 (B40)	Low income	Non employed	Yes	3	3	3	3	3	3	3	3	3	3	3	3	3	3	3	3	2	2	2	2	2	2	2	2	2	2	2	15	15	12	10	5	5	5	5	5	5	5	5
MEL14	48	Malay	Malay	widow	Primary & Secondary school	Lower education	<RM 3030 (B40)	Low income	Non employed	No	4	4	4	4	4	3	3	3	3	3	4	4	4	4	4	3	1	1	1	1	1	2	2	2	2	2	2	20	15	7	10	6	6	7	7	5	5	5	6
MEL15	60	Malay	Malay	widow	Primary & Secondary school	Lower education	<RM 3030 (B40)	Low income	Non employed	Yes	3	3	3	3	3	3	3	3	3	3	3	3	3	3	3	3	2	2	2	2	2	2	2	2	2	2	2	15	15	12	10	5	5	5	5	5	5	5	5
MEL16	48	Malay	Malay	widow	Primary & Secondary school	Lower education	<RM 3030 (B40)	Low income	Non employed	Yes	3	3	3	3	3	3	3	3	3	3	3	3	3	3	3	3	2	2	2	2	2	2	2	2	2	2	2	15	15	12	10	5	5	5	5	5	5	5	5
MEL17	48	Malay	Malay	widow	Primary & Secondary school	Lower education	<RM 3030 (B40)	Low income	Non employed	Yes	3	3	3	3	3	3	3	3	3	3	3	3	3	3	3	3	2	2	2	2	2	2	2	2	2	2	2	15	15	12	10	5	5	5	5	5	5	5	5
MEL18	55	Malay	Malay	widow	No formal education	Lower education	<RM 3030 (B40)	Low income	employed	No	3	3	3	3	3	3	3	2	3	3	3	3	3	3	3	3	2	2	2	2	2	2	3	2	3	3	3	15	14	12	14	5	5	5	5	5	5	5	5
MEL19	49	Malay	Malay	divorcee	Primary & Secondary school	Lower education	<RM 3030 (B40)	Low income	Non employed	No	3	3	3	3	3	3	3	3	3	3	3	3	3	3	3	3	2	2	2	2	2	2	3	3	3	3	3	15	15	12	15	5	5	5	5	5	5	5	5
MEL20	45	Malay	Malay	widow	No formal education	Lower education	<RM 3030 (B40)	Low income	employed	No	3	3	3	3	3	3	3	3	2	3	3	3	3	3	3	3	2	2	2	2	2	2	3	3	3	3	2	15	14	12	14	5	3	5	5	5	5	5	5
MEL21	57	Malay	Malay	widow	Primary & Secondary school	Lower education	<RM 3030 (B40)	Low income	Non employed	Yes	3	3	3	3	3	3	3	3	3	3	3	3	3	3	3	3	2	2	2	2	2	2	2	3	2	2	2	15	15	12	11	5	5	5	5	5	5	5	5
MEL22	32	Malay	Malay	widow	Primary & Secondary school	Lower education	<RM 3030 (B40)	Low income	employed	No	4	4	4	3	4	3	3	3	3	3	3	4	4	4	4	3	2	1	1	1	1	2	2	3	2	2	2	19	15	8	11	6	6	7	7	6	5	5	7
MEL23	51	Malay	Malay	widow	Primary & Secondary school	Lower education	<RM 3030 (B40)	Low income	Non employed	Yes	3	3	3	3	3	3	3	3	3	3	3	3	3	3	3	3	2	2	2	2	2	2	2	2	2	2	2	15	15	12	10	6	6	6	6	6	5	5	6
MEL24	55	Malay	Malay	widow	Primary & Secondary school	Lower education	<RM 3030 (B40)	Low income	Non employed	Yes	3	3	3	3	3	3	3	3	3	3	3	3	3	3	3	3	2	2	2	2	2	2	2	3	2	2	2	15	15	12	11	6	6	6	6	6	6	5	6
MEL25	46	Malay	Malay	widow	Primary & Secondary school	Lower education	<RM 3030 (B40)	Low income	Non employed	Yes	3	3	3	3	3	3	3	3	3	3	3	3	3	3	3	3	2	2	2	2	2	2	2	2	2	2	2	15	15	12	10	5	6	5	5	5	5	3	5
MEL26	50	Malay	Malay	widow	Primary & Secondary school	Lower education	<RM 3030 (B40)	Low income	Non employed	No	3	3	3	3	3	3	3	4	3	3	3	3	4	3	3	3	2	2	1	2	2	2	2	3	2	2	2	15	16	11	11	5	5	6	5	5	3	3	5
MEL27	52	Malay	Malay	widow	Primary & Secondary school	Lower education	<RM 3030 (B40)	Low income	employed	Yes	2	2	1	2	2	3	3	2	3	2	3	3	3	3	3	3	2	2	2	2	2	2	3	3	3	3	3	9	13	12	15	5	5	5	5	5	5	5	6
MEL28	58	Malay	Malay	widow	Primary & Secondary school	Lower education	<RM 3030 (B40)	Low income	Non employed	Yes	3	2	3	2	4	4	4	4	4	3	4	4	4	4	4	4	1	1	1	1	1	1	2	3	2	2	4	14	19	6	13	7	7	1	1	7	5	4	1
MEL29	50	Malay	Malay	widow	Primary & Secondary school	Lower education	<RM 3030 (B40)	Low income	employed	Yes	2	2	2	3	3	3	3	3	3	2	3	3	3	3	3	3	2	2	2	2	2	2	2	3	2	2	2	12	14	12	11	4	4	5	5	4	5	3	4
MEL30	42	Malay	Malay	widow	Primary & Secondary school	Lower education	<RM 3030 (B40)	Low income	employed	No	3	3	3	3	3	3	3	3	3	3	3	3	3	3	3	3	2	2	2	2	2	2	2	2	3	3	3	15	15	12	13	5	5	5	5	5	5	3	5
MEL31	47	Malay	Malay	widow	Primary & Secondary school	Lower education	<RM 3030 (B40)	Low income	employed	Yes	1	1	2	1	1	3	4	3	3	2	4	3	4	3	3	3	1	2	1	2	2	2	1	2	2	2	1	6	15	10	8	7	6	7	6	6	6	3	6
MEL32	39	Malay	Malay	divorcee	Primary & Secondary school	Lower education	<RM 3030 (B40)	Low income	employed	No	1	1	1	2	2	3	3	3	3	3	4	3	4	4	3	3	1	2	1	1	2	2	2	2	2	2	2	7	15	9	10	5	4	7	5	5	5	3	6
MEL33	53	Malay	Malay	widow	Primary & Secondary school	Lower education	<RM 3030 (B40)	Low income	Non employed	No	2	2	2	2	3	3	3	3	3	3	3	4	3	3	3	3	2	1	2	2	2	2	2	2	2	2	2	11	15	11	10	6	5	7	7	6	6	5	7
MEL34	51	Malay	Malay	widow	Primary & Secondary school	Lower education	<RM 3030 (B40)	Low income	Non employed	No	3	3	3	3	3	3	3	3	3	3	3	3	3	3	3	3	2	2	2	2	2	2	2	2	2	2	2	15	15	12	10	5	5	5	5	5	5	5	7
MEL35	49	Malay	Malay	widow	Primary & Secondary school	Lower education	<RM 3030 (B40)	Low income	employed	No	3	3	2	2	2	3	2	4	2	2	4	3	4	3	4	3	1	2	1	2	1	2	2	2	1	2	2	12	13	9	9	7	6	5	5	5	7	6	7
MEL36	31	Malay	Malay	divorcee	Primary & Secondary school	Lower education	<RM 3030 (B40)	Low income	Non employed	Yes	4	4	4	4	4	4	3	4	3	4	3	3	3	3	3	3	2	2	2	2	2	2	2	2	2	2	2	20	18	12	10	5	5	5	5	5	5	5	6
MEL37	35	Malay	Malay	divorcee	Primary & Secondary school	Lower education	<RM 3030 (B40)	Low income	employed	No	4	4	4	3	3	3	3	3	3	3	3	3	3	3	3	3	2	2	2	2	2	2	2	2	2	2	2	18	15	12	10	5	5	5	5	5	5	5	5
TM21	43	Malay	Malay	widow	Primary & Secondary school	Lower education	<RM 3030 (B40)	Low income	employed	No	2	2	2	3	2	2	2	2	2	2	3	3	3	3	3	3	2	2	2	2	2	2	2	3	2	2	3	11	10	12	12	6	5	6	6	6	5	3	4
BCM2	60	Chinese	Non malay	widow	Primary & Secondary school	Lower education	<RM 3030 (B40)	Low income	Non employed	Yes	2	2	2	2	3	3	3	3	4	3	4	3	4	4	4	4	1	2	1	1	1	1	2	3	2	3	3	11	16	7	13	5	6	5	5	5	5	4	4
BCM3	60	Chinese	Non malay	widow	Primary & Secondary school	Lower education	<RM 3030 (B40)	Low income	Non employed	No	2	3	2	2	2	2	3	3	3	1	4	4	4	4	4	3	1	1	1	1	1	2	2	3	2	2	3	11	12	7	12	5	6	6	4	4	7	5	5
BCM4	55	Chinese	Non malay	widow	Certificate/Diploma/STPM	Higher education	<RM 3030 (B40)	Low income	Non employed	Yes	2	3	2	2	2	2	3	3	3	2	4	4	4	4	4	3	1	1	1	1	1	2	2	3	2	2	3	11	13	7	12	5	6	6	6	5	6	5	5
BCM5	57	Chinese	Non malay	widow	Primary & Secondary school	Lower education	<RM 3030 (B40)	Low income	Non employed	Yes	2	4	2	2	2	1	3	3	3	1	4	4	4	4	4	3	1	1	1	1	1	2	2	3	1	2	3	12	11	7	11	5	6	3	7	6	7	5	5
BCM6	55	Chinese	Non malay	widow	Primary & Secondary school	Lower education	<RM 3030 (B40)	Low income	employed	No	2	3	2	2	2	2	3	3	3	1	4	4	4	4	4	3	1	1	1	1	1	2	2	3	2	2	3	11	12	7	12	5	6	5	5	5	5	5	5
BCM7	60	Chinese	Non malay	widow	No formal education	Lower education	<RM 3030 (B40)	Low income	Non employed	Yes	2	2	2	2	3	3	3	3	4	3	4	3	4	4	4	4	1	2	1	1	1	1	2	3	2	3	3	11	16	7	13	5	6	5	5	5	5	4	5
BCM8	42	Chinese	Non malay	widow	Primary & Secondary school	Lower education	<RM 3030 (B40)	Low income	Non employed	Yes	2	2	2	3	3	3	3	3	3	2	4	4	4	4	4	4	1	1	1	1	1	1	2	2	2	3	1	12	14	6	10	5	6	6	6	5	5	5	6
BCM9	60	Chinese	Non malay	divorcee	Primary & Secondary school	Lower education	<RM 3030 (B40)	Low income	Non employed	Yes	2	3	2	2	2	2	3	3	3	1	4	4	4	4	4	4	1	1	1	1	1	1	2	3	2	2	3	11	12	6	12	5	6	5	6	5	5	5	5
BCM10	59	Chinese	Non malay	widow	No formal education	Lower education	<RM 3030 (B40)	Low income	Non employed	No	2	2	2	2	3	3	3	3	4	3	4	3	4	4	4	4	1	2	1	1	1	1	2	3	2	3	3	11	16	7	13	5	6	5	5	5	5	4	5
BCM12	58	Chinese	Non malay	widow	Primary & Secondary school	Lower education	<RM 3030 (B40)	Low income	Non employed	Yes	3	2	2	2	2	2	3	3	3	2	4	4	4	4	4	3	1	1	1	1	1	2	2	3	2	2	3	11	13	7	12	5	6	6	6	6	5	5	5
BCM13	57	Chinese	Non malay	divorcee	Primary & Secondary school	Lower education	<RM 3030 (B40)	Low income	Non employed	No	2	2	2	2	3	3	3	3	4	3	4	3	4	4	4	4	1	2	1	1	1	1	2	3	2	3	3	11	16	7	13	5	7	5	5	5	5	4	5
BCM14	53	Chinese	Non malay	divorcee	Primary & Secondary school	Lower education	<RM 3030 (B40)	Low income	Non employed	Yes	3	3	3	3	3	3	3	3	3	3	4	3	3	3	3	3	1	2	2	2	2	2	2	2	2	3	3	15	15	11	12	3	6	6	6	6	6	5	5
BCM15	56	Chinese	Non malay	divorcee	Certificate/Diploma/STPM	Higher education	<RM 3030 (B40)	Low income	employed	No	2	2	2	2	3	3	3	3	3	2	3	3	3	4	4	3	2	2	2	1	1	2	1	3	2	3	2	11	14	10	11	4	5	4	4	4	5	5	3
BCM16	52	Malay	Malay	widow	Primary & Secondary school	Lower education	<RM 3030 (B40)	Low income	Non employed	Yes	2	2	2	2	4	3	4	4	4	2	3	4	4	3	4	3	2	1	1	2	1	2	2	2	1	2	2	12	17	9	9	6	7	6	7	6	4	4	6
BCM17	49	Malay	Malay	divorcee	Certificate/Diploma/STPM	Higher education	<RM 3030 (B40)	Low income	employed	No	3	3	3	3	3	4	4	4	3	2	3	3	3	4	4	4	2	2	2	1	1	1	1	1	1	2	1	15	17	9	6	5	5	7	7	5	7	5	7
BC18	49	Malay	Malay	widow	Primary & Secondary school	Lower education	<RM 3030 (B40)	Low income	Non employed	No	1	1	2	1	1	3	2	2	2	3	3	3	3	3	3	3	2	2	2	2	2	2	3	2	2	2	3	6	12	12	12	5	5	5	5	5	5	4	5
BC19	40	Chinese	Non malay	divorcee	Certificate/Diploma/STPM	Higher education	<RM 3030 (B40)	Low income	employed	No	4	4	3	3	3	4	4	4	4	4	4	4	4	4	4	4	1	1	1	1	1	1	2	2	2	2	2	17	20	6	10	4	4	7	7	3	4	3	7
BC20	58	Malay	Malay	widow	Primary & Secondary school	Lower education	<RM 3030 (B40)	Low income	Non employed	Yes	2	2	2	2	4	2	2	3	2	2	4	4	3	3	3	3	1	1	2	2	2	2	2	2	2	2	3	12	11	10	11	6	5	7	6	5	5	5	7
BC21	60	Malay	Malay	widow	Primary & Secondary school	Lower education	<RM 3030 (B40)	Low income	Non employed	No	2	2	2	2	4	2	1	4	4	1	4	4	4	4	4	4	1	1	1	1	1	1	1	1	1	1	1	12	12	6	5	4	4	7	7	1	7	6	7
BC22	41	Malay	Malay	widow	degree	Higher education	<RM 3030 (B40)	Low income	employed	No	2	2	2	2	4	2	1	4	4	1	4	4	4	4	4	4	1	1	1	1	1	1	1	1	1	1	1	12	12	6	5	4	4	7	7	1	7	6	7
TP2	41	Malay	Malay	divorcee	degree	Higher education	<RM 3030 (B40)	Low income	employed	No	2	2	3	2	2	3	3	3	3	2	3	3	3	3	3	3	2	2	2	2	2	2	2	3	2	2	2	11	14	12	11	3	3	6	6	2	6	3	5
BC23	52	Malay	Malay	widow	degree	Higher education	<RM 3030 (B40)	Low income	employed	No	2	2	2	2	4	2	1	4	4	1	4	4	4	4	4	4	1	1	1	1	1	1	1	1	1	1	1	12	12	6	5	4	4	7	7	1	7	6	7
BC24	56	Malay	Malay	widow	degree	Higher education	<RM 3030 (B40)	Low income	employed	No	2	3	3	2	4	2	1	4	4	1	4	4	4	4	4	4	1	1	1	1	1	1	3	1	1	1	1	14	12	6	7	4	4	7	7	1	7	6	7
BC25	54	Malay	Malay	divorcee	Primary & Secondary school	Lower education	<RM 3030 (B40)	Low income	Non employed	No	1	1	1	1	1	1	3	3	3	1	4	4	4	4	4	3	1	1	1	1	1	2	3	4	3	2	2	5	11	7	14	7	7	7	7	7	6	2	7
BC26	58	Malay	Malay	divorcee	Primary & Secondary school	Lower education	<RM 3030 (B40)	Low income	Non employed	Yes	4	4	4	4	4	2	3	3	3	1	4	4	4	4	4	4	1	1	1	1	1	1	3	4	3	2	2	20	12	6	14	7	7	7	7	7	6	2	7
BC27	47	Malay	Malay	widow	Primary & Secondary school	Lower education	<RM 3030 (B40)	Low income	employed	No	3	3	3	3	3	4	3	3	2	2	4	4	4	4	4	4	1	1	1	1	1	1	1	1	2	1	2	15	14	6	7	5	5	6	6	4	4	6	6
BC28	44	Malay	Malay	widow	Primary & Secondary school	Lower education	<RM 3030 (B40)	Low income	employed	No	3	3	2	1	3	3	4	3	2	2	3	4	4	4	4	3	2	1	1	1	1	2	1	1	2	2	3	12	14	8	9	6	6	5	7	4	5	5	5
BC39	28	Malay	Malay	divorcee	Primary & Secondary school	Lower education	<RM 3030 (B40)	Low income	employed	No	3	2	3	3	2	3	2	3	3	2	3	3	4	4	4	4	2	2	1	1	1	1	1	3	3	4	2	13	13	8	13	3	1	5	5	4	5	5	5
BC30	31	Malay	Malay	divorcee	degree	Higher education	<RM 3030 (B40)	Low income	employed	No	3	2	3	3	2	3	2	3	3	2	3	3	3	3	3	3	2	2	2	2	2	2	2	2	3	4	3	13	13	12	14	3	1	5	5	4	5	5	5
KBA16	50	Malay	Malay	widow	Primary & Secondary school	Lower education	<RM 3030 (B40)	Low income	employed	Yes	3	3	2	2	2	3	3	3	4	3	3	3	4	4	4	3	2	2	1	1	1	2	2	2	1	3	2	12	16	9	10	5	6	6	6	6	6	5	6
KBA17	50	Malay	Malay	widow	Primary & Secondary school	Lower education	<RM 3030 (B40)	Low income	employed	No	3	3	3	3	3	3	3	3	3	3	3	3	3	3	3	3	2	2	2	2	2	2	2	2	2	3	3	15	15	12	12	3	3	5	5	3	5	5	5
KBA18	56	Malay	Malay	widow	No formal education	Lower education	<RM 3030 (B40)	Low income	employed	Yes	3	3	3	3	3	3	3	4	3	4	4	4	4	3	4	3	1	1	1	2	1	2	3	2	2	1	2	15	17	8	10	6	6	7	7	6	5	5	7
KBA19	46	Malay	Malay	widow	Primary & Secondary school	Lower education	<RM 3030 (B40)	Low income	employed	Yes	3	3	3	3	2	2	1	3	2	2	3	3	3	4	4	3	2	2	2	1	1	2	1	3	1	2	2	14	10	10	9	5	6	6	5	6	5	6	7
KBA20	56	Malay	Malay	widow	Primary & Secondary school	Lower education	<RM 3030 (B40)	Low income	Non employed	No	2	2	2	2	2	3	3	3	3	3	3	3	3	3	3	3	2	2	2	2	2	2	2	2	2	2	2	10	15	12	10	5	5	5	5	5	5	5	5
KBA21	40	Malay	Malay	widow	Certificate/Diploma/STPM	Higher education	<RM 3030 (B40)	Low income	employed	No	2	2	2	2	2	3	3	3	3	3	3	3	3	3	3	3	2	2	2	2	2	2	2	2	2	2	2	10	15	12	10	5	5	5	5	5	5	5	5
KBA22	52	Malay	Malay	widow	Certificate/Diploma/STPM	Higher education	RM 3030 hingga RM 6619 (M40)	High income	employed	No	2	2	2	2	2	3	2	2	2	2	3	3	3	3	3	3	2	2	2	2	2	2	2	2	2	2	2	10	11	12	10	5	5	5	6	3	5	5	5
KBA23	40	Malay	Malay	divorcee	Primary & Secondary school	Lower education	<RM 3030 (B40)	Low income	employed	No	3	3	2	3	2	3	3	3	3	2	3	3	4	4	4	3	2	2	1	1	1	2	2	2	3	2	2	13	14	9	11	5	5	5	5	5	5	5	5
KBA24	33	Malay	Malay	widow	Primary & Secondary school	Lower education	<RM 3030 (B40)	Low income	employed	No	2	2	2	2	2	3	3	3	3	2	3	4	4	4	4	3	2	1	1	1	1	2	2	3	2	3	3	10	14	8	13	5	4	5	5	4	5	5	5
KBA25	49	Malay	Malay	widow	Primary & Secondary school	Lower education	<RM 3030 (B40)	Low income	Non employed	No	2	1	2	2	3	3	2	4	4	3	4	4	4	4	4	3	1	1	1	1	1	2	3	3	3	4	4	10	16	7	17	6	5	6	6	4	4	5	6
KBA26	51	Malay	Malay	widow	Primary & Secondary school	Lower education	<RM 3030 (B40)	Low income	employed	Yes	2	2	2	2	3	4	3	4	3	3	4	4	4	4	4	4	1	1	1	1	1	1	2	2	3	2	2	11	17	6	11	3	3	5	5	3	4	4	5
KBA27	41	Malay	Malay	divorcee	Primary & Secondary school	Lower education	<RM 3030 (B40)	Low income	employed	Yes	3	3	3	3	3	2	2	2	3	3	3	3	3	3	3	3	2	2	2	2	2	2	3	2	2	2	3	15	12	12	12	4	4	5	5	5	4	5	5
KBA28	55	Malay	Malay	widow	Primary & Secondary school	Lower education	<RM 3030 (B40)	Low income	employed	No	1	2	2	1	1	3	3	3	3	2	3	3	3	3	3	3	2	2	2	2	2	2	2	2	2	3	2	7	14	12	11	5	5	5	5	5	4	3	4
KBA29	43	Malay	Malay	divorcee	Primary & Secondary school	Lower education	<RM 3030 (B40)	Low income	employed	No	2	2	2	1	2	3	3	3	3	1	3	3	3	3	3	3	2	2	2	2	2	2	2	3	3	3	3	9	13	12	14	5	5	4	4	5	4	3	4
KBA30	59	Malay	Malay	divorcee	Primary & Secondary school	Lower education	<RM 3030 (B40)	Low income	employed	No	2	2	2	2	2	3	3	3	2	2	3	3	3	3	3	3	2	2	2	2	2	2	4	3	3	3	2	10	13	12	15	5	5	4	4	5	4	3	5
KBA31	40	Malay	Malay	divorcee	Primary & Secondary school	Lower education	<RM 3030 (B40)	Low income	employed	No	1	1	1	1	1	3	3	3	3	2	3	3	3	3	3	3	2	2	2	2	2	2	2	3	2	3	3	5	14	12	13	5	5	5	5	5	4	5	5
KBA32	47	Malay	Malay	widow	Primary & Secondary school	Lower education	<RM 3030 (B40)	Low income	employed	No	2	2	2	2	2	3	3	3	3	2	3	3	3	3	3	3	2	2	2	2	2	2	2	2	2	3	2	10	14	12	11	5	5	4	4	5	4	3	5
KBA33	48	Malay	Malay	widow	Certificate/Diploma/STPM	Higher education	RM 3030 hingga RM 6619 (M40)	High income	employed	No	2	2	2	2	2	3	2	2	2	2	4	4	4	4	4	4	1	1	1	1	1	1	2	2	2	2	2	10	11	6	10	5	5	5	5	3	5	5	5
KBA34	44	Malay	Malay	divorcee	Certificate/Diploma/STPM	Higher education	RM 3030 hingga RM 6619 (M40)	High income	employed	No	3	3	3	2	2	2	2	2	2	2	4	4	4	4	4	4	1	1	1	1	1	1	1	1	1	1	1	13	10	6	5	5	5	5	5	5	5	5	5
KBA36	39	Malay	Malay	divorcee	Certificate/Diploma/STPM	Higher education	<RM 3030 (B40)	Low income	employed	No	3	3	3	2	3	3	3	4	3	2	3	3	3	3	3	3	2	2	2	2	2	2	1	1	1	1	1	14	15	12	5	5	5	5	5	5	5	2	5
KBA37	42	Malay	Malay	divorcee	Primary & Secondary school	Lower education	RM 3030 hingga RM 6619 (M40)	High income	employed	No	2	2	2	2	2	4	3	3	3	3	3	3	3	3	3	3	2	2	2	2	2	2	2	3	2	2	2	10	16	12	11	5	5	5	5	5	5	5	5
KBA1	41	Malay	Malay	widow	Primary & Secondary school	Lower education	<RM 3030 (B40)	Low income	employed	No	3	3	2	2	3	4	4	4	4	4	4	4	4	4	4	4	1	1	1	1	1	1	3	3	2	2	2	13	20	6	12	3	5	7	7	3	7	5	7
KBA2	37	Malay	Malay	divorcee	Primary & Secondary school	Lower education	<RM 3030 (B40)	Low income	employed	No	2	1	2	2	1	3	2	3	3	4	3	4	3	4	3	3	2	1	2	1	2	2	2	2	1	2	2	8	15	10	9	7	6	7	5	6	5	5	7
KBA3	37	Malay	Malay	divorcee	Primary & Secondary school	Lower education	<RM 3030 (B40)	Low income	employed	No	2	2	2	2	2	3	2	3	2	2	3	3	3	3	3	3	2	2	2	2	2	2	2	2	2	2	2	10	12	12	10	4	3	5	5	4	4	4	5
KBA4	58	Malay	Malay	divorcee	Primary & Secondary school	Lower education	<RM 3030 (B40)	Low income	employed	No	3	3	2	2	1	3	3	3	3	2	3	4	4	4	4	4	2	1	1	1	1	1	3	2	2	3	2	11	14	7	12	5	6	6	6	6	6	5	6
KBA5	46	Malay	Malay	divorcee	Certificate/Diploma/STPM	Higher education	<RM 3030 (B40)	Low income	employed	Yes	2	2	2	2	2	4	4	4	4	3	4	4	4	4	4	4	1	1	1	1	1	1	1	2	1	1	2	10	19	6	7	6	6	7	7	7	7	6	7
KBA6	60	Malay	Malay	widow	Primary & Secondary school	Lower education	<RM 3030 (B40)	Low income	Non employed	Yes	2	2	1	1	1	3	3	3	3	3	3	3	3	3	3	3	2	2	2	2	2	2	1	2	1	1	2	7	15	12	7	6	7	7	7	7	7	7	7
KBA7	59	Malay	Malay	widow	Certificate/Diploma/STPM	Higher education	RM 3030 hingga RM 6619 (M40)	High income	Non employed	Yes	2	2	1	2	2	4	3	3	3	2	4	4	4	4	4	4	1	1	1	1	1	1	1	2	1	1	3	9	15	6	8	6	6	6	7	7	7	7	7
KBA8	50	Malay	Malay	widow	degree	Higher education	RM 3030 hingga RM 6619 (M40)	High income	employed	No	1	1	1	1	1	2	2	3	3	1	4	4	3	4	4	4	1	1	2	1	1	1	2	3	3	2	3	5	11	7	13	3	3	5	5	3	6	5	6
KBA9	53	Malay	Malay	widow	Certificate/Diploma/STPM	Higher education	<RM 3030 (B40)	Low income	employed	No	3	3	3	3	3	4	3	4	4	4	4	4	4	4	4	4	1	1	1	1	1	1	1	1	1	1	1	15	19	6	5	7	7	7	7	7	6	7	7
KBA10	44	Malay	Malay	widow	Certificate/Diploma/STPM	Higher education	<RM 3030 (B40)	Low income	employed	Yes	3	3	3	2	2	3	3	4	3	3	4	4	4	4	4	4	1	1	1	1	1	1	2	2	2	2	2	13	16	6	10	5	5	5	5	5	5	3	5
KBA11	44	Malay	Malay	widow	Certificate/Diploma/STPM	Higher education	<RM 3030 (B40)	Low income	Non employed	No	2	3	2	2	3	2	2	3	3	2	3	4	4	3	4	3	2	1	1	2	1	2	1	3	1	2	3	12	12	9	10	3	5	5	5	3	5	3	3
KBA12	49	Malay	Malay	widow	Certificate/Diploma/STPM	Higher education	RM 3030 hingga RM 6619 (M40)	High income	employed	No	2	2	2	1	2	3	3	3	3	3	4	4	3	4	4	3	1	1	2	1	1	2	1	2	2	2	2	9	15	8	9	3	5	5	5	5	5	5	5
KBA13	42	Malay	Malay	widow	Primary & Secondary school	Lower education	<RM 3030 (B40)	Low income	employed	Yes	2	2	3	3	3	4	4	4	3	3	4	3	4	3	4	4	1	2	1	2	1	1	1	1	1	1	2	13	18	8	6	6	7	7	7	7	3	2	6
KBA14	55	Malay	Malay	divorcee	Primary & Secondary school	Lower education	<RM 3030 (B40)	Low income	Non employed	No	2	2	2	2	2	3	3	3	3	2	3	3	3	3	3	3	2	2	2	2	2	2	2	3	2	2	3	10	14	12	12	4	5	4	5	5	5	4	5
KBA15	54	Malay	Malay	widow	Primary & Secondary school	Lower education	<RM 3030 (B40)	Low income	employed	Yes	2	2	2	2	2	2	2	2	2	2	3	3	3	2	3	3	2	2	2	3	2	2	2	4	2	1	2	10	10	13	11	3	3	3	3	3	2	2	3
KR1	51	Malay	Malay	widow	Primary & Secondary school	Lower education	<RM 3030 (B40)	Low income	Non employed	Yes	1	1	2	2	2	2	3	2	3	2	3	3	3	3	3	3	2	2	2	2	2	2	2	2	2	2	2	8	12	12	10	6	5	5	5	5	5	5	5
KR2	48	Malay	Malay	widow	Primary & Secondary school	Lower education	<RM 3030 (B40)	Low income	employed	No	2	2	2	2	2	2	3	3	3	2	3	4	4	3	3	3	2	1	1	2	2	2	2	2	2	2	2	10	13	10	10	6	6	6	6	6	6	5	6
KR3	54	Malay	Malay	widow	Primary & Secondary school	Lower education	<RM 3030 (B40)	Low income	Non employed	No	2	1	1	2	1	2	3	2	3	2	3	3	3	3	3	3	2	2	2	2	2	2	2	2	2	2	2	7	12	12	10	5	5	5	5	5	5	5	5
KR4	49	Malay	Malay	widow	Primary & Secondary school	Lower education	<RM 3030 (B40)	Low income	employed	Yes	1	1	1	1	2	2	3	1	3	2	3	3	3	3	3	3	2	2	2	2	2	2	2	2	2	2	2	6	11	12	10	6	6	6	6	6	5	5	5
KR5	53	Malay	Malay	widow	Primary & Secondary school	Lower education	<RM 3030 (B40)	Low income	Non employed	No	2	1	1	2	3	2	3	3	2	2	4	3	4	3	3	3	1	2	1	2	2	2	2	2	2	2	2	9	12	10	10	6	6	6	5	5	5	5	5
KR6	28	Malay	Malay	divorcee	Primary & Secondary school	Lower education	<RM 3030 (B40)	Low income	employed	No	1	1	1	2	2	2	3	2	3	1	3	3	3	3	3	3	2	2	2	2	2	2	2	2	2	2	2	7	11	12	10	6	6	6	6	6	4	5	5
KR7	51	Malay	Malay	widow	Primary & Secondary school	Lower education	<RM 3030 (B40)	Low income	employed	No	1	1	1	2	1	2	3	3	3	2	3	3	3	3	3	3	2	2	2	2	2	2	2	2	1	2	2	6	13	12	9	6	6	5	5	5	4	5	5
KR8	43	Malay	Malay	widow	Primary & Secondary school	Lower education	<RM 3030 (B40)	Low income	employed	No	2	2	2	2	2	2	3	3	3	2	3	3	3	3	3	3	2	2	2	2	2	2	2	2	2	2	2	10	13	12	10	5	5	6	5	6	5	6	6
KR9	41	Malay	Malay	widow	Primary & Secondary school	Lower education	<RM 3030 (B40)	Low income	employed	No	1	1	1	2	1	2	3	3	3	1	3	3	3	4	3	3	2	2	2	1	2	2	2	1	1	1	2	6	12	11	7	6	6	6	6	6	6	5	5
KR10	49	Malay	Malay	divorcee	Primary & Secondary school	Lower education	<RM 3030 (B40)	Low income	employed	No	1	1	1	1	3	1	3	3	3	2	4	4	4	4	4	4	1	1	1	1	1	1	2	2	2	2	2	7	12	6	10	6	6	6	6	6	6	5	5
KR11	49	Malay	Malay	widow	Primary & Secondary school	Lower education	<RM 3030 (B40)	Low income	employed	No	2	2	1	2	3	2	3	1	3	2	3	4	3	4	4	4	2	1	2	1	1	1	1	1	1	2	2	10	11	8	7	6	6	6	5	5	6	6	6
KR12	44	Malay	Malay	widow	Primary & Secondary school	Lower education	<RM 3030 (B40)	Low income	employed	No	1	1	1	1	1	1	3	1	3	1	4	3	4	4	4	3	1	2	1	1	1	2	1	1	2	2	2	5	9	8	8	6	6	6	6	6	6	6	6
KR13	52	Malay	Malay	widow	Primary & Secondary school	Lower education	<RM 3030 (B40)	Low income	Non employed	Yes	1	1	1	2	1	2	3	2	3	2	3	4	3	4	4	4	2	1	2	1	1	1	1	2	2	2	1	6	12	8	8	5	5	5	5	5	5	5	5
KR14	45	Malay	Malay	divorcee	Primary & Secondary school	Lower education	<RM 3030 (B40)	Low income	employed	No	3	3	3	3	3	2	3	1	3	1	3	3	4	4	3	4	2	2	1	1	2	1	2	1	2	2	3	15	10	9	10	6	6	6	5	5	5	6	5
KR15	37	Malay	Malay	widow	Primary & Secondary school	Lower education	<RM 3030 (B40)	Low income	employed	No	3	3	3	3	3	2	3	2	3	1	4	3	4	3	4	4	1	2	1	2	1	1	1	2	1	2	2	15	11	8	8	7	6	5	5	6	4	5	5
KR26	39	Malay	Malay	divorcee	Primary & Secondary school	Lower education	<RM 3030 (B40)	Low income	employed	No	2	2	2	2	3	3	3	3	3	2	3	3	3	3	3	3	2	2	2	2	2	2	2	3	3	2	2	11	14	12	12	5	5	5	5	5	5	5	5
KR27	45	Malay	Malay	divorcee	Primary & Secondary school	Lower education	<RM 3030 (B40)	Low income	employed	Yes	1	2	1	1	1	2	2	2	2	2	4	4	4	3	3	4	1	1	1	2	2	1	2	3	2	2	2	6	10	8	11	5	5	5	5	5	5	5	5
KR28	42	Malay	Malay	divorcee	Primary & Secondary school	Lower education	<RM 3030 (B40)	Low income	employed	No	2	2	3	2	2	3	2	3	2	2	3	3	3	4	4	3	2	2	2	1	1	2	1	2	1	1	2	11	12	10	7	3	3	5	5	3	4	3	5
KR29	49	Malay	Malay	divorcee	Primary & Secondary school	Lower education	<RM 3030 (B40)	Low income	employed	Yes	3	3	3	3	3	3	2	3	2	2	3	3	3	3	3	2	2	2	2	2	2	3	1	2	2	2	3	15	12	13	10	3	3	5	5	3	3	5	7
KR30	37	Malay	Malay	divorcee	Primary & Secondary school	Lower education	<RM 3030 (B40)	Low income	employed	No	1	1	1	1	1	2	3	3	3	3	4	4	4	4	4	4	1	1	1	1	1	1	2	2	2	3	3	5	14	6	12	3	3	5	5	3	3	3	5
KR31	37	Malay	Malay	widow	Primary & Secondary school	Lower education	<RM 3030 (B40)	Low income	employed	No	3	2	2	1	2	3	1	3	3	2	3	3	4	4	3	3	2	2	1	1	2	2	2	2	2	3	4	10	12	10	13	5	5	5	6	5	4	3	5
KR32	35	Malay	Malay	divorcee	Primary & Secondary school	Lower education	<RM 3030 (B40)	Low income	employed	No	2	2	2	2	2	3	3	3	3	2	3	3	4	4	4	3	2	2	1	1	1	2	2	2	2	3	2	10	14	9	11	6	5	5	5	6	5	5	5
KR33	46	Malay	Malay	divorcee	Primary & Secondary school	Lower education	<RM 3030 (B40)	Low income	Non employed	No	2	2	2	2	3	3	3	3	3	2	3	3	3	3	3	3	2	2	2	2	2	2	2	3	2	3	3	11	14	12	13	6	6	5	5	5	5	5	5
KR34	41	Malay	Malay	widow	Certificate/Diploma/STPM	Higher education	<RM 3030 (B40)	Low income	employed	No	2	2	2	2	3	4	4	4	4	3	3	3	4	4	4	3	2	2	1	1	1	2	1	2	1	2	2	11	19	9	8	7	7	2	6	7	5	3	5
KR35	53	Malay	Malay	widow	Primary & Secondary school	Lower education	<RM 3030 (B40)	Low income	employed	No	1	1	1	1	1	3	3	3	3	2	3	3	3	3	3	3	2	2	2	2	2	2	2	2	2	3	3	5	14	12	12	5	5	6	6	5	5	5	5
KR36	57	Malay	Malay	widow	Primary & Secondary school	Lower education	<RM 3030 (B40)	Low income	Non employed	No	2	2	2	2	2	3	3	3	1	2	3	3	3	3	3	3	2	2	2	2	2	2	2	2	2	2	2	10	12	12	10	6	6	6	6	6	5	5	5
KR37	36	Malay	Malay	widow	Primary & Secondary school	Lower education	<RM 3030 (B40)	Low income	employed	No	2	2	2	2	2	3	2	3	2	3	3	3	3	3	3	3	2	2	2	2	2	2	2	3	2	3	3	10	13	12	13	5	6	7	6	7	5	5	6
KR38	37	Malay	Malay	divorcee	Primary & Secondary school	Lower education	<RM 3030 (B40)	Low income	employed	No	2	2	2	4	3	3	3	3	3	2	3	3	3	3	3	3	2	2	2	2	2	2	2	2	2	3	3	13	14	12	12	2	5	5	5	5	4	5	5
KR39	39	Malay	Malay	divorcee	Primary & Secondary school	Lower education	<RM 3030 (B40)	Low income	employed	No	2	2	2	2	2	3	3	3	3	2	3	3	3	3	3	3	2	2	2	2	2	2	2	2	2	3	3	10	14	12	12	5	5	5	5	5	5	5	5
KR40	36	Malay	Malay	divorcee	Primary & Secondary school	Lower education	<RM 3030 (B40)	Low income	employed	No	2	2	2	3	3	3	3	3	3	2	3	3	3	3	3	3	2	2	2	2	2	2	2	2	2	3	3	12	14	12	12	5	5	5	5	5	5	5	5
KR41	60	Malay	Malay	divorcee	Primary & Secondary school	Lower education	<RM 3030 (B40)	Low income	Non employed	No	2	2	3	3	4	4	3	4	4	1	4	4	3	4	4	3	1	1	2	1	1	2	2	2	2	2	3	14	16	8	11	6	6	6	7	7	7	5	7
KR42	28	Malay	Malay	divorcee	Primary & Secondary school	Lower education	<RM 3030 (B40)	Low income	employed	No	3	3	3	3	3	3	3	3	3	2	3	3	3	4	4	4	2	2	2	1	1	1	2	2	2	3	3	15	14	9	12	6	6	6	7	7	7	5	7
KR43	47	Malay	Malay	widow	Primary & Secondary school	Lower education	<RM 3030 (B40)	Low income	employed	Yes	2	2	2	2	1	2	2	2	4	2	3	4	3	4	4	3	2	1	2	1	1	2	2	2	2	2	3	9	12	9	11	3	7	5	5	5	5	4	5
KR44	49	Malay	Malay	widow	Primary & Secondary school	Lower education	<RM 3030 (B40)	Low income	employed	No	2	2	2	2	2	3	3	3	3	2	3	3	3	3	3	3	2	2	2	2	2	2	3	3	3	3	3	10	14	12	15	5	4	5	5	3	5	3	5
KR45	60	Malay	Malay	widow	Primary & Secondary school	Lower education	<RM 3030 (B40)	Low income	Non employed	Yes	2	2	2	2	2	1	1	1	1	1	3	4	3	3	3	3	2	1	2	2	2	2	2	2	2	2	3	10	5	11	11	6	6	6	6	6	5	4	5
KR46	55	Malay	Malay	divorcee	Primary & Secondary school	Lower education	<RM 3030 (B40)	Low income	employed	No	3	3	3	3	3	4	4	3	3	3	4	4	4	4	4	3	1	1	1	1	1	2	2	2	1	1	1	15	17	7	7	4	5	5	6	5	4	4	6
KR47	55	Malay	Malay	divorcee	Primary & Secondary school	Lower education	<RM 3030 (B40)	Low income	Non employed	Yes	2	2	2	2	2	3	2	3	2	2	3	3	3	4	3	3	2	2	2	1	2	2	2	2	2	2	2	10	12	11	10	7	7	7	7	7	5	5	7
KR48	25	Malay	Malay	divorcee	Primary & Secondary school	Lower education	<RM 3030 (B40)	Low income	employed	Yes	2	2	2	2	3	3	3	3	3	2	4	4	4	4	4	4	1	1	1	1	1	1	3	2	2	2	3	11	14	6	12	5	5	5	6	6	6	6	6
KR49	49	Malay	Malay	widow	Primary & Secondary school	Lower education	<RM 3030 (B40)	Low income	Non employed	No	1	1	1	1	1	1	1	1	1	1	3	3	3	3	3	3	2	2	2	2	2	2	2	3	2	3	2	5	5	12	12	3	3	5	3	3	3	5	5
KR50	52	Malay	Malay	widow	Primary & Secondary school	Lower education	<RM 3030 (B40)	Low income	Non employed	Yes	4	4	4	4	4	4	4	4	4	3	4	4	4	4	4	4	1	1	1	1	1	1	2	3	2	3	3	20	19	6	13	5	5	5	5	5	4	4	5
KR51	52	Malay	Malay	widow	Primary & Secondary school	Lower education	<RM 3030 (B40)	Low income	Non employed	No	2	2	2	2	3	2	1	3	1	2	3	4	3	3	3	3	2	1	2	2	2	2	2	2	2	1	1	11	9	11	8	6	5	7	6	5	6	5	5
KR52	46	Malay	Malay	widow	Primary & Secondary school	Lower education	<RM 3030 (B40)	Low income	employed	No	1	1	1	1	1	3	3	3	3	2	3	3	3	3	3	3	2	2	2	2	2	2	3	3	3	4	4	5	14	12	17	5	5	5	5	5	5	5	5
KR53	41	Malay	Malay	divorcee	Primary & Secondary school	Lower education	<RM 3030 (B40)	Low income	Non employed	Yes	4	3	1	3	3	3	3	3	3	2	3	3	3	3	4	4	2	2	2	2	1	1	3	3	3	4	3	14	14	10	16	5	6	5	5	6	5	6	6
KR54	58	Malay	Malay	widow	Primary & Secondary school	Lower education	<RM 3030 (B40)	Low income	Non employed	Yes	2	2	2	2	2	4	3	4	4	4	4	4	4	4	4	4	1	1	1	1	1	1	4	3	3	2	3	10	19	6	15	5	6	6	6	6	6	6	6
KR55	38	Malay	Malay	divorcee	Primary & Secondary school	Lower education	<RM 3030 (B40)	Low income	Non employed	Yes	4	4	3	3	4	4	4	3	3	2	3	3	3	4	4	4	2	2	2	1	1	1	3	2	2	3	2	18	16	9	12	5	5	5	5	5	4	4	5
KR56	54	Malay	Malay	widow	Primary & Secondary school	Lower education	<RM 3030 (B40)	Low income	Non employed	Yes	2	2	2	1	1	3	3	2	2	3	3	3	3	3	3	3	2	2	2	2	2	2	3	1	3	3	3	8	13	12	13	5	4	6	7	7	5	3	6
KR57	60	Malay	Malay	widow	Primary & Secondary school	Lower education	<RM 3030 (B40)	Low income	Non employed	Yes	3	3	3	3	3	3	3	4	3	3	3	3	3	3	3	3	2	2	2	2	2	2	3	2	3	3	3	15	16	12	14	5	5	7	5	5	5	5	5
KR58	60	Malay	Malay	widow	Primary & Secondary school	Lower education	<RM 3030 (B40)	Low income	Non employed	Yes	3	3	3	3	3	3	3	4	3	3	3	3	3	3	3	3	2	2	2	2	2	2	3	2	3	3	3	15	16	12	14	5	5	5	5	5	5	5	5
KR59	54	Malay	Malay	widow	Primary & Secondary school	Lower education	<RM 3030 (B40)	Low income	Non employed	Yes	3	4	3	3	4	4	4	4	4	1	3	3	3	4	4	3	2	2	2	1	1	2	2	3	2	3	2	17	17	10	12	5	5	5	6	4	5	4	5
KR60	60	Malay	Malay	widow	Primary & Secondary school	Lower education	<RM 3030 (B40)	Low income	Non employed	Yes	2	2	2	1	1	3	3	2	2	3	3	3	3	3	3	3	2	2	2	2	2	2	4	3	3	3	3	8	13	12	16	5	1	5	6	6	5	3	6
KR62	39	Malay	Malay	divorcee	Primary & Secondary school	Lower education	<RM 3030 (B40)	Low income	employed	Yes	3	3	2	3	3	3	2	3	2	2	3	3	3	3	3	3	2	2	2	2	2	2	2	2	2	2	3	14	12	12	11	4	5	5	5	4	5	4	5
KR63	27	Malay	Malay	divorcee	Primary & Secondary school	Lower education	<RM 3030 (B40)	Low income	employed	No	2	2	2	2	2	3	2	3	2	2	3	3	3	4	3	3	2	2	2	1	2	2	2	2	2	2	3	10	12	11	11	3	5	5	5	4	4	4	6
KR65	43	Malay	Malay	widow	Primary & Secondary school	Lower education	<RM 3030 (B40)	Low income	Non employed	No	3	3	3	3	3	3	3	3	4	3	3	4	4	4	4	3	2	1	1	1	1	2	2	3	1	1	1	15	16	8	8	3	3	6	7	3	5	5	5
KR66	57	Malay	Malay	widow	Certificate/Diploma/STPM	Higher education	<RM 3030 (B40)	Low income	Non employed	Yes	2	2	1	2	2	2	1	3	3	3	3	3	3	3	3	3	2	2	2	2	2	2	2	2	2	2	3	9	12	12	11	3	5	7	7	7	5	5	5
KR67	49	Malay	Malay	widow	Primary & Secondary school	Lower education	<RM 3030 (B40)	Low income	Non employed	No	2	2	3	3	3	3	3	3	3	3	3	3	3	3	3	3	2	2	2	2	2	2	3	3	3	3	3	13	15	12	15	5	5	5	5	5	5	5	5
KR68	44	Malay	Malay	divorcee	Certificate/Diploma/STPM	Higher education	<RM 3030 (B40)	Low income	employed	No	3	3	3	3	3	4	3	3	3	3	3	3	3	3	3	3	2	2	2	2	2	2	2	2	2	2	2	15	16	12	10	5	5	5	5	4	5	4	5
KR69	22	Malay	Malay	divorcee	Primary & Secondary school	Lower education	<RM 3030 (B40)	Low income	Non employed	No	3	3	3	2	2	3	3	3	3	2	3	3	3	3	3	3	2	2	2	2	2	2	2	2	2	2	2	13	14	12	10	5	5	5	5	4	5	4	5
KR70	38	Malay	Malay	widow	Primary & Secondary school	Lower education	<RM 3030 (B40)	Low income	employed	No	2	2	2	2	3	4	2	3	3	2	3	3	3	3	3	3	2	2	2	2	2	2	2	2	2	2	2	11	14	12	10	5	5	6	6	6	4	3	6
TMA1	47	Indian	Non malay	widow	Primary & Secondary school	Lower education	<RM 3030 (B40)	Low income	employed	No	1	2	1	1	1	3	2	2	2	1	3	3	3	3	4	3	2	2	2	2	1	2	3	3	3	3	1	6	10	11	13	4	3	5	6	3	7	3	6
TMA2	55	Indian	Non malay	divorcee	Primary & Secondary school	Lower education	<RM 3030 (B40)	Low income	Non employed	Yes	1	2	2	2	3	3	2	3	2	3	4	4	4	4	4	4	1	1	1	1	1	1	2	3	2	4	2	10	13	6	13	3	3	5	3	4	3	2	5
TMA3	55	Indian	Non malay	widow	Primary & Secondary school	Lower education	<RM 3030 (B40)	Low income	employed	No	2	2	3	2	3	2	2	3	2	3	3	3	3	3	3	3	2	2	2	2	2	2	2	3	2	3	3	12	12	12	13	2	5	5	5	3	3	3	3
TMA4	54	Indian	Non malay	divorcee	Primary & Secondary school	Lower education	<RM 3030 (B40)	Low income	employed	Yes	1	2	2	2	2	2	2	4	3	3	4	4	4	4	4	4	1	1	1	1	1	1	1	2	1	3	4	9	14	6	11	7	5	5	4	4	4	4	4
PM1	54	Malay	Malay	widow	Certificate/Diploma/STPM	Higher education	<RM 3030 (B40)	Low income	Non employed	Yes	2	2	2	2	2	3	3	4	4	1	3	3	3	3	3	2	2	2	2	2	2	3	1	4	1	1	3	10	15	13	10	7	7	7	7	7	7	7	7
PM2	59	Malay	Malay	divorcee	Primary & Secondary school	Lower education	<RM 3030 (B40)	Low income	Non employed	Yes	2	2	2	2	1	3	3	4	3	1	3	3	3	3	3	3	2	2	2	2	2	2	2	1	2	2	3	9	14	12	10	5	5	5	5	5	5	5	5
PM3	54	Malay	Malay	widow	Primary & Secondary school	Lower education	<RM 3030 (B40)	Low income	Non employed	Yes	1	1	1	1	1	3	3	4	3	1	3	3	3	3	3	3	2	2	2	2	2	2	2	2	2	2	3	5	14	12	11	5	5	5	5	4	4	4	4
PM4	57	Malay	Malay	widow	Primary & Secondary school	Lower education	<RM 3030 (B40)	Low income	Non employed	Yes	1	1	1	1	1	3	2	4	3	1	3	3	3	3	3	3	2	2	2	2	2	2	2	2	2	2	3	5	13	12	11	5	5	5	4	4	4	4	5
PM5	46	Malay	Malay	divorcee	Primary & Secondary school	Lower education	<RM 3030 (B40)	Low income	employed	Yes	2	2	2	2	3	3	3	4	3	1	4	4	4	4	4	4	1	1	1	1	1	1	2	3	2	2	2	11	14	6	11	5	5	6	7	5	5	5	7
PM6	33	Malay	Malay	widow	Primary & Secondary school	Lower education	<RM 3030 (B40)	Low income	Non employed	No	2	2	2	1	2	3	2	3	3	2	4	4	3	3	4	4	1	1	2	2	1	1	2	2	3	2	2	9	13	8	11	3	2	5	5	5	5	5	5
PM7	34	Malay	Malay	divorcee	Primary & Secondary school	Lower education	<RM 3030 (B40)	Low income	employed	No	3	2	3	2	3	3	2	2	3	3	3	3	3	3	3	3	2	2	2	2	2	2	3	3	2	2	2	13	13	12	12	4	4	5	5	4	5	5	4
PM8	48	Malay	Malay	widow	Primary & Secondary school	Lower education	<RM 3030 (B40)	Low income	Non employed	Yes	2	2	2	2	2	3	3	3	1	2	3	3	3	3	3	3	2	2	2	2	2	2	1	2	1	2	3	10	12	12	9	5	5	5	5	4	5	4	4
PM9	56	Malay	Malay	divorcee	Primary & Secondary school	Lower education	<RM 3030 (B40)	Low income	Non employed	Yes	1	1	1	1	1	3	4	4	3	1	3	3	4	4	4	3	2	2	1	1	1	2	2	2	2	2	3	5	15	9	11	4	4	5	5	4	4	4	5
PM10	46	Malay	Malay	widow	Primary & Secondary school	Lower education	<RM 3030 (B40)	Low income	Non employed	Yes	2	2	1	1	2	3	4	4	3	1	3	3	3	3	3	3	2	2	2	2	2	2	2	2	2	2	3	8	15	12	11	4	4	5	5	4	5	4	5
PM11	54	Malay	Malay	divorcee	Primary & Secondary school	Lower education	<RM 3030 (B40)	Low income	Non employed	Yes	2	2	2	2	1	3	3	3	3	1	3	3	3	3	3	3	2	2	2	2	2	2	2	3	2	2	3	9	13	12	12	5	5	5	5	5	5	4	5
PM12	31	Malay	Malay	divorcee	Primary & Secondary school	Lower education	<RM 3030 (B40)	Low income	employed	Yes	2	2	2	2	1	3	3	3	3	1	3	3	3	3	3	3	2	2	2	2	2	2	2	2	2	2	3	9	13	12	11	4	4	5	4	4	4	4	4
PM13	37	Malay	Malay	widow	Certificate/Diploma/STPM	Higher education	<RM 3030 (B40)	Low income	employed	No	2	2	2	2	1	3	3	3	3	1	3	3	3	3	3	3	2	2	2	2	2	2	2	2	2	2	3	9	13	12	11	4	4	5	4	4	4	4	4
PM14	44	Malay	Malay	divorcee	Primary & Secondary school	Lower education	<RM 3030 (B40)	Low income	Non employed	No	2	1	1	1	2	3	3	4	3	1	3	3	4	4	4	3	2	2	1	1	1	2	2	2	2	2	3	7	14	9	11	4	4	5	5	4	5	5	5
PM15	53	Malay	Malay	widow	Primary & Secondary school	Lower education	<RM 3030 (B40)	Low income	employed	No	1	1	1	1	1	3	2	4	2	1	3	3	3	3	3	3	2	2	2	2	2	2	1	1	1	2	3	5	12	12	8	5	5	5	5	5	4	4	5
PM16	35	Malay	Malay	divorcee	Primary & Secondary school	Lower education	<RM 3030 (B40)	Low income	employed	No	1	1	1	1	1	3	1	3	1	1	3	3	3	4	4	4	2	2	2	1	1	1	1	2	1	2	3	5	9	9	9	7	7	7	7	7	7	4	5
PM17	52	Malay	Malay	widow	Certificate/Diploma/STPM	Higher education	<RM 3030 (B40)	Low income	Non employed	Yes	1	1	1	1	1	3	2	4	1	1	3	3	3	3	3	3	2	2	2	2	2	2	1	2	2	2	3	5	11	12	10	6	6	6	6	6	6	6	6
PM18	49	Malay	Malay	divorcee	Primary & Secondary school	Lower education	<RM 3030 (B40)	Low income	Non employed	Yes	2	2	2	2	2	3	2	3	2	2	3	3	3	3	3	3	2	2	2	2	2	2	1	2	2	2	3	10	12	12	10	5	5	5	5	5	5	5	5
PM19	55	Malay	Malay	widow	Primary & Secondary school	Lower education	<RM 3030 (B40)	Low income	Non employed	No	2	2	2	2	2	3	2	3	2	2	3	3	3	3	3	3	2	2	2	2	2	2	1	2	2	4	3	10	12	12	12	5	5	5	5	5	5	5	5
PM20	59	Malay	Malay	divorcee	Primary & Secondary school	Lower education	<RM 3030 (B40)	Low income	employed	Yes	2	2	2	2	2	3	2	3	2	2	3	3	3	3	3	3	2	2	2	2	2	2	1	2	2	2	3	10	12	12	10	5	5	5	5	5	5	5	5
PM21	54	Malay	Malay	widow	Primary & Secondary school	Lower education	<RM 3030 (B40)	Low income	Non employed	No	2	2	2	2	2	3	4	4	3	1	3	3	3	3	3	3	2	2	2	2	2	2	1	2	1	2	3	10	15	12	9	5	5	5	5	5	4	4	4
PM22	44	Malay	Malay	divorcee	Primary & Secondary school	Lower education	<RM 3030 (B40)	Low income	employed	No	4	4	4	4	1	4	4	4	4	4	3	3	4	4	4	4	2	2	1	1	1	1	4	3	1	4	4	17	20	8	16	7	6	5	7	6	7	2	7
PM23	46	Malay	Malay	widow	Primary & Secondary school	Lower education	<RM 3030 (B40)	Low income	Non employed	No	2	4	2	2	2	3	1	3	1	1	3	3	3	3	4	4	2	2	2	2	1	1	1	2	1	3	3	12	9	10	10	7	7	7	7	7	7	4	5
PM24	56	Malay	Malay	widow	Primary & Secondary school	Lower education	<RM 3030 (B40)	Low income	employed	Yes	1	1	1	1	1	3	1	3	1	1	3	3	3	3	4	4	2	2	2	2	1	1	1	2	2	2	3	5	9	10	10	7	7	7	7	7	7	4	5
PM25	42	Malay	Malay	divorcee	Primary & Secondary school	Lower education	<RM 3030 (B40)	Low income	employed	No	1	1	1	1	1	3	3	4	4	2	3	3	3	4	4	4	2	2	2	1	1	1	1	2	1	2	3	5	16	9	9	3	5	5	5	5	5	5	5
PM26	58	Malay	Malay	widow	Primary & Secondary school	Lower education	<RM 3030 (B40)	Low income	Non employed	No	1	1	1	1	1	3	3	4	3	1	3	3	3	3	3	3	2	2	2	2	2	2	2	2	2	2	3	5	14	12	11	5	5	5	5	5	5	5	5
PM27	56	Malay	Malay	widow	Primary & Secondary school	Lower education	<RM 3030 (B40)	Low income	employed	Yes	2	2	2	2	2	3	3	4	3	2	3	3	3	3	3	3	2	2	2	2	2	2	2	3	2	2	3	10	15	12	12	5	5	5	5	5	4	4	4
PM28	47	Malay	Malay	widow	Primary & Secondary school	Lower education	<RM 3030 (B40)	Low income	Non employed	Yes	2	2	2	2	3	2	3	4	4	2	3	3	3	3	3	3	2	2	2	2	2	2	2	2	2	2	3	11	15	12	11	5	5	5	5	5	5	4	5
PM29	38	Malay	Malay	divorcee	Certificate/Diploma/STPM	Higher education	<RM 3030 (B40)	Low income	employed	No	1	1	1	1	1	3	4	4	3	2	4	4	4	4	4	4	1	1	1	1	1	1	2	3	2	2	4	5	16	6	13	5	5	5	5	5	5	5	4
PM30	57	Malay	Malay	divorcee	Primary & Secondary school	Lower education	<RM 3030 (B40)	Low income	employed	No	1	1	2	1	2	2	3	2	3	2	3	3	3	3	3	3	2	2	2	2	2	2	2	3	2	2	3	7	12	12	12	5	5	5	5	5	5	5	5
PM31	60	Malay	Malay	widow	Primary & Secondary school	Lower education	<RM 3030 (B40)	Low income	employed	No	2	2	2	2	2	3	3	3	3	2	3	3	3	3	3	2	2	2	2	2	2	3	2	3	2	2	3	10	14	13	12	5	5	5	5	5	5	5	5
PM32	54	Malay	Malay	widow	Primary & Secondary school	Lower education	<RM 3030 (B40)	Low income	employed	No	2	2	2	2	3	2	3	3	3	2	3	3	3	3	3	3	2	2	2	2	2	2	2	3	2	2	3	11	13	12	12	5	5	5	5	5	5	5	5
PM33	52	Malay	Malay	widow	Primary & Secondary school	Lower education	<RM 3030 (B40)	Low income	Non employed	No	1	1	1	1	1	2	3	3	3	2	3	3	3	3	3	3	2	2	2	2	2	2	4	2	2	2	2	5	13	12	12	5	5	5	5	5	5	3	5
PM34	57	Malay	Malay	widow	Primary & Secondary school	Lower education	<RM 3030 (B40)	Low income	Non employed	Yes	2	2	2	2	1	3	3	4	3	1	4	4	4	4	4	4	1	1	1	1	1	1	2	3	2	2	2	9	14	6	11	5	5	6	7	5	5	5	7
PM35	52	Malay	Malay	widow	Certificate/Diploma/STPM	Higher education	RM 3030 hingga RM 6619 (M40)	High income	employed	Yes	2	2	1	2	1	3	2	3	2	2	3	3	3	3	4	3	2	2	2	2	1	2	4	4	3	2	2	8	12	11	15	6	6	6	6	6	5	5	5
PM36	56	Malay	Malay	widow	Primary & Secondary school	Lower education	<RM 3030 (B40)	Low income	Non employed	Yes	2	2	2	2	3	3	3	3	3	2	3	3	3	3	3	3	2	2	2	2	2	2	2	3	2	2	3	11	14	12	12	5	5	5	5	5	5	5	5
PM37	39	Malay	Malay	divorcee	Primary & Secondary school	Lower education	<RM 3030 (B40)	Low income	employed	No	2	2	2	2	3	2	3	3	3	2	3	3	3	3	3	3	2	2	2	2	2	2	3	2	2	2	3	11	13	12	12	5	5	5	5	5	5	5	5
PM38	60	Malay	Malay	widow	Primary & Secondary school	Lower education	<RM 3030 (B40)	Low income	Non employed	Yes	2	2	2	2	2	3	1	3	3	3	4	4	4	4	4	4	1	1	1	1	1	1	2	2	2	2	2	10	13	6	10	5	4	5	7	4	6	5	6
PM39	57	Malay	Malay	divorcee	Primary & Secondary school	Lower education	<RM 3030 (B40)	Low income	Non employed	Yes	3	3	3	3	3	3	1	2	1	1	4	4	4	4	4	3	1	1	1	1	1	2	2	1	1	1	1	15	8	7	6	5	6	6	6	6	5	2	6
PM40	43	Malay	Malay	widow	Primary & Secondary school	Lower education	<RM 3030 (B40)	Low income	employed	No	2	2	2	2	3	2	3	3	3	2	3	3	3	3	3	3	2	2	2	2	2	2	2	3	2	2	3	11	13	12	12	5	5	5	5	5	5	5	5
PM41	53	Malay	Malay	divorcee	Primary & Secondary school	Lower education	<RM 3030 (B40)	Low income	Non employed	Yes	1	1	1	2	3	3	3	3	3	2	3	3	3	3	3	3	2	2	2	2	2	2	2	2	2	2	3	8	14	12	11	5	5	5	5	5	5	5	5
PM42	53	Malay	Malay	widow	Primary & Secondary school	Lower education	<RM 3030 (B40)	Low income	Non employed	Yes	2	2	2	2	3	3	3	4	3	2	3	3	3	3	3	3	2	2	2	2	2	2	2	2	2	2	3	11	15	12	11	5	5	5	5	5	5	4	5
PM43	44	Malay	Malay	widow	Primary & Secondary school	Lower education	<RM 3030 (B40)	Low income	employed	No	1	1	1	1	2	2	3	4	3	1	3	3	3	3	3	3	2	2	2	2	2	2	2	2	2	2	3	6	13	12	11	5	5	5	5	5	5	4	5
PM44	50	Malay	Malay	divorcee	Primary & Secondary school	Lower education	<RM 3030 (B40)	Low income	Non employed	No	2	2	1	1	2	3	4	4	3	1	4	4	3	3	4	3	1	1	2	2	1	2	2	2	2	2	3	8	15	9	11	5	5	5	5	4	5	4	5
PM45	59	Malay	Malay	widow	Primary & Secondary school	Lower education	<RM 3030 (B40)	Low income	Non employed	No	2	2	2	2	3	3	3	3	3	3	3	3	3	3	3	3	2	2	2	2	2	2	2	3	2	2	3	11	15	12	12	5	5	5	4	4	4	4	5
PM46	45	Malay	Malay	divorcee	Primary & Secondary school	Lower education	<RM 3030 (B40)	Low income	employed	No	2	2	1	1	3	3	3	4	3	1	3	3	3	3	3	3	2	2	2	2	2	2	2	2	2	2	3	9	14	12	11	5	5	5	5	5	5	5	5
PM47	45	Malay	Malay	widow	Primary & Secondary school	Lower education	<RM 3030 (B40)	Low income	Non employed	No	2	2	2	2	2	3	3	3	3	2	3	3	3	3	3	3	2	2	2	2	2	2	2	2	2	2	3	10	14	12	11	5	5	5	5	4	5	4	5
PM48	57	Malay	Malay	widow	Primary & Secondary school	Lower education	<RM 3030 (B40)	Low income	employed	No	1	1	2	1	1	3	3	4	3	1	3	3	3	3	3	3	2	2	2	2	2	2	2	3	2	2	3	6	14	12	12	5	5	5	5	5	5	4	5
PM49	60	Malay	Malay	widow	Primary & Secondary school	Lower education	<RM 3030 (B40)	Low income	Non employed	Yes	3	3	3	3	2	2	1	3	3	2	4	4	4	4	4	2	1	1	1	1	1	3	2	2	2	2	2	14	11	8	10	6	6	6	6	6	5	3	6
PM50	60	Malay	Malay	widow	Primary & Secondary school	Lower education	<RM 3030 (B40)	Low income	employed	Yes	2	2	2	2	3	3	3	3	2	2	3	3	3	3	3	3	2	2	2	2	2	2	3	3	2	2	3	11	13	12	13	5	4	5	4	4	4	4	5
PM51	53	Malay	Malay	divorcee	Primary & Secondary school	Lower education	<RM 3030 (B40)	Low income	employed	Yes	1	1	1	2	3	3	3	3	3	2	3	3	3	3	3	3	2	2	2	2	2	2	2	2	2	2	3	8	14	12	11	5	5	5	5	5	5	5	5
PM52	53	Malay	Malay	widow	Primary & Secondary school	Lower education	<RM 3030 (B40)	Low income	Non employed	Yes	2	2	2	2	3	3	3	4	3	2	3	3	3	3	3	3	2	2	2	2	2	2	2	2	2	2	3	11	15	12	11	5	5	5	5	5	5	4	5
PM53	44	Malay	Malay	widow	Primary & Secondary school	Lower education	<RM 3030 (B40)	Low income	employed	No	1	1	1	1	2	2	3	4	3	1	3	3	3	3	3	3	2	2	2	2	2	2	2	2	2	2	3	6	13	12	11	5	5	5	5	5	5	4	5
PM54	50	Malay	Malay	divorcee	Primary & Secondary school	Lower education	<RM 3030 (B40)	Low income	employed	No	2	2	1	1	2	3	4	4	3	1	4	4	3	3	4	3	1	1	2	2	1	2	2	2	2	2	3	8	15	9	11	5	5	5	5	4	5	4	5
PM55	58	Malay	Malay	widow	Primary & Secondary school	Lower education	<RM 3030 (B40)	Low income	Non employed	No	2	2	2	2	3	3	3	3	3	3	3	3	3	3	3	3	2	2	2	2	2	2	2	3	2	2	3	11	15	12	12	5	5	5	4	4	4	4	5
PM56	45	Malay	Malay	divorcee	Primary & Secondary school	Lower education	<RM 3030 (B40)	Low income	employed	No	2	2	1	1	2	3	3	4	3	1	3	3	3	3	3	3	2	2	2	2	2	2	2	2	2	2	3	8	14	12	11	5	5	5	5	5	5	5	5
PM57	45	Malay	Malay	divorcee	Primary & Secondary school	Lower education	<RM 3030 (B40)	Low income	employed	No	2	2	2	2	2	3	3	3	3	2	3	3	3	3	3	3	2	2	2	2	2	2	2	2	2	2	3	10	14	12	11	5	5	5	5	4	5	4	5
PM58	60	Malay	Malay	widow	Primary & Secondary school	Lower education	<RM 3030 (B40)	Low income	Non employed	Yes	1	1	2	1	1	3	3	4	3	1	3	3	3	3	3	3	2	2	2	2	2	2	2	3	2	2	3	6	14	12	12	5	5	5	5	5	5	4	5
PM59	60	Malay	Malay	widow	Primary & Secondary school	Lower education	<RM 3030 (B40)	Low income	Non employed	Yes	3	3	3	3	3	2	1	3	3	2	4	4	4	4	4	4	1	1	1	1	1	1	2	2	2	2	2	15	11	6	10	6	6	6	6	5	5	3	6
KR24	32	Malay	Malay	widow	Certificate/Diploma/STPM	Higher education	<RM 3030 (B40)	Low income	employed	Yes	3	2	3	2	3	3	3	3	3	2	3	3	3	3	3	3	2	2	2	2	2	2	2	3	3	3	3	13	14	12	14	5	5	5	5	5	5	5	5
KR61	41	Malay	Malay	widow	Certificate/Diploma/STPM	Higher education	<RM 3030 (B40)	Low income	employed	No	3	3	3	3	3	3	3	3	2	3	3	3	3	3	3	3	2	2	2	2	2	2	2	2	3	2	2	15	14	12	11	4	5	5	5	4	5	5	5
KR26	40	Malay	Malay	divorcee	Certificate/Diploma/STPM	Higher education	<RM 3030 (B40)	Low income	employed	Yes	3	2	3	2	2	3	3	3	3	2	3	3	3	3	3	3	2	2	2	2	2	2	2	3	3	3	3	12	14	12	14	4	4	5	5	4	4	4	4
[truncated: 61 more columns]
